# Supplementary material for: Assessment of rock glaciers and their water storage in Guokalariju, Tibetan Plateau
Source: Copernicus journal article supplement (doi:10.5194/tc-18-1-2024), 2024-01-02
Supplement: Supplementary file 1 [file tc-18-1-2024-supplement.zip]

Archive with 6 entries (6 files):
- Supplement.pdf
- Rgpolygons.kmz
- RgInventory-GKLRJ.xlsx
- tc-18-1-2024-supplement-title-page.pdf
- Rgpointmutisystem.kmz
- Rgpointunit.kmz
