# Supplementary material for: Assessment of rock glaciers and their water storage in Guokalariju, Tibetan Plateau
Source: Copernicus journal article supplement (doi:10.5194/tc-18-1-2024), 2024-01-02
Supplement: Supplementary file 1 [file tc-18-1-2024-supplement.zip › Supplement.pdf]

## Supplements.

**Table S1: Ice thickness of glaciers in Guokalariju calculated by different models.**

| Model                                                      | Min ice thickness<br>(m) | Max ice thickness<br>(m) | Mean ice thickness<br>(m) |
|------------------------------------------------------------|--------------------------|--------------------------|---------------------------|
| Open Global Glacier Model<br>(OGGM; Maussion et al., 2018) | 1                        | 176                      | 24.05                     |
| GlabTop2 (Frey et al., 2014)                               | 1                        | 208                      | 23.87                     |
| Farinotti et al. (2019)                                    | 4                        | 147                      | 28.82                     |

**Table S2: Ice volumes (km<sup>3</sup>) and corresponding WVEQs (km<sup>3</sup>) referred to Janke *et al.* (2015) and calculated using the perfectly plastic model (Cicoira *et al.*, 2021) for sub-regions and Guokalariju-wide (All).**

| Region  | Glacier<br>WVEQ<br>(km <sup>3</sup> ) | Min RG<br>WVEQ<br>(km <sup>3</sup> ) | Max RG<br>WVEQ<br>(km <sup>3</sup> ) | Mean RG<br>WVEQ<br>(km <sup>3</sup> ) | RG : Glacier<br>WVER<br>ratio |
|---------|---------------------------------------|--------------------------------------|--------------------------------------|---------------------------------------|-------------------------------|
| All     | 3.95                                  | 1.83                                 | 0.87                                 | 1.35                                  | 1:2.92                        |
| Western | 0.06                                  | 0.08                                 | 0.17                                 | 0.13                                  | 2.08:1                        |
| Central | 2.65                                  | 0.71                                 | 1.46                                 | 1.09                                  | 1:2.44                        |
| Eastern | 1.24                                  | 0.06                                 | 0.21                                 | 0.14                                  | 1:9.19                        |

\*Min RG WVEQ = Active RG (25% ice content) + transitional RG (10% ice content) + relict RG (0 ice content)

\*Max RG WVEQ = Active RG (45% ice content) + transitional RG (25% ice content) + relict RG (10% ice content)

\*Mean RG WVEQ is the mean value of the min and max, and it used to be compared to the WVEQ of glaciers.
