# Supplementary material for: Assessment of rock glaciers and their water storage in Guokalariju, Tibetan Plateau
Source: Copernicus journal article supplement (doi:10.5194/tc-18-1-2024), 2024-01-02
Supplement: Supplementary file 1 [file tc-18-1-2024-supplement.zip › tc-18-1-2024-supplement-title-page.pdf]

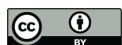

## *Supplement of*

# **Assessment of rock glaciers and their water storage in Guokalariju, Tibetan Plateau**

**Mengzhen Li et al.**

*Correspondence to:* Gengnian Liu (liugn@pku.edu.cn)

- tc-18-1-2024-supplement-title-page.pdf
- RgInventory-GKLRJ.xlsx
- Rgpointmutisystem.kmz
- Rgpointunit.kmz
- Rgpolygons.kmz
- Supplement.pdf

The copyright of individual parts of the supplement might differ from the article licence.
